# Supplementary material
Source: publisher figshare collection journal article supplement (https://acs.figshare.com/ndownloader/files/5128651)
Supplement: Supplementary file 1 [file 5128651]

## **Cover Sheet for Supplementary Information**

“Halogen Substitution Patterns Among Disinfection Byproducts in the Information Collection Rule Database”

by Alexa Obolensky and Philip C. Singer

ES&T manuscript number es0489339

# pages: 15

# figures: 4

# tables: 9
